# Supplementary material for: A Method for Calculating the Sign and Degree of Chirality of Supercoiled Protein Structures
Source: MDPI journal article supplement (doi:10.3390/sym15112051), 2023-11-12
Supplement: s1 [file s1]

**Table S1.** Table with computational data for all calculated helices.

1

| Protein class  | Superhelix <sup>1</sup> | Number of helices | Chains           | Amino acid sequence <sup>2</sup> | Helix lengths <sup>3</sup> | Effective angle | Twist direction |
|----------------|-------------------------|-------------------|------------------|----------------------------------|----------------------------|-----------------|-----------------|
| Oxidoreductase | 1AFR                    | 2                 | A                | A/189-200; A/240-229             | 12                         | 39,380          | L               |
|                | 1EZV                    | 2                 | C                | C/130-116; C/183-197             | 15                         | 32,399          | L               |
|                | 1FYZ                    | 2                 | A                | A/107-121; A/155-141             | 15                         | 34,182          | L               |
|                | 1GU2                    | 2                 | A                | A/16-5; A/106-117                | 12                         | 42,518          | L               |
|                | 1H0O                    | 2                 | A                | A/132-146; A/181-167             | 15                         | 37,735          | L               |
|                | 1IS2                    | 2                 | A                | A/557-568; A/599-588             | 12                         | 47,849          | L               |
|                | 1JKU                    | 2                 | A                | A/141-159; A/189-171             | 19                         | 52,370          | L               |
|                | 1MHY                    | 2                 | D                | D/111-125; D/151-137             | 15                         | 33,629          | L               |
|                | 1NG3                    | 2                 | A,C              | A/272-283; C/283-272             | 12                         | 57,604          | L               |
|                | 1OTK                    | 2                 | A                | A/95-109; A/142-128              | 15                         | 67,439          | L               |
|                | 1PHZ                    | 2                 | A                | A/298-309; A/392-403             | 12                         | 19,277          | L               |
|                | 1R2F                    | 2                 | A                | A/60-71; A/109-98                | 12                         | 33,718          | L               |
|                | 1U6I                    | 2                 | A,B              | A/138-149; B/149-138             | 12                         | 28,084          | L               |
|                | 1YQ9                    | 2                 | H                | H/239-250; H/433-422             | 12                         | 15,324          | L               |
|                | 1YUX                    | 2                 | A                | A/54-30; A/63-87                 | 25                         | 75,284          | L               |
|                | 1ZA0                    | 2                 | A                | A/152-170; A/200-182             | 19                         | 71,192          | L               |
|                | 1ZOY                    | 2                 | D                | D/60-49; D/68-79                 | 12                         | 44,528          | L               |
|                | 2B0T                    | 2                 | A                | A/657-668; A/691-680             | 12                         | 50,383          | L               |
|                | 2C2X                    | 2                 | A                | A/12-26; A/265-279               | 15                         | 35,185          | L               |
|                | 2CWL                    | 2                 | A                | A/36-47; A/74-63                 | 12                         | 46,983          | L               |
| Hydrolase      | 2F1K                    | 2                 | A,B              | A/252-238; B/241-255             | 15                         | 25,153          | L               |
|                | 2FYN                    | 2                 | M                | M/145-131; M/198-212             | 15                         | 35,179          | L               |
|                | 2HKO                    | 2                 | A                | A/434-462; A/511-483             | 29                         | 83,371          | L               |
|                | 1AQT                    | 2                 | A                | A/105-91; A/117-131              | 15                         | 48,522          | L               |
|                | 1AYX                    | 2                 | A                | A/220-234; A/257-243             | 15                         | 43,265          | L               |
|                | 1FS0                    | 2                 | G                | G/56-32; G/216-240               | 25                         | 81,113          | L               |
|                | 1H12                    | 2                 | A                | A/157-146; A/168-179             | 12                         | 38,669          | L               |
|                | 1HUF                    | 2                 | A                | A/16-5; A/110-121                | 12                         | 49,361          | L               |
|                | 1K46                    | 2                 | A,B <sup>4</sup> | A/16-5; B/110-121                | 12                         | 49,931          | L               |
|                | 1KS8                    | 2                 | A                | A/5-16; A/429-418                | 12                         | 37,169          | L               |
|                | 1L1Y                    | 2                 | C                | C/444-455; C/526-537             | 12                         | 31,134          | L               |
|                | 1LF9                    | 2                 | A                | A/448-462; A/485-471             | 15                         | 38,455          | L               |
|                | 1S4B                    | 2                 | P                | P/164-181; P/269-252             | 18                         | 57,208          | L               |
|                | 1WCH                    | 2                 | A                | A/2208-2197; A/2461-2472         | 12                         | 36,639          | L               |
|                | 1WP9                    | 2                 | A                | A/219-233; A/289-275             | 15                         | 50,106          | L               |
|                | 1XZQ_0                  | 2                 | A                | A/171-153; A/412-430             | 19                         | 62,797          | L               |
|                | 1XZQ_1                  | 2                 | A                | A/185-199; A/406-392             | 15                         | 41,192          | L               |
|                | 1YVW                    | 2                 | A                | A/50-33; A/59-76                 | 18                         | 42,006          | L               |
|                | 1YXB                    | 2                 | A                | A/52-38; A/61-75                 | 15                         | 41,404          | L               |
|                | 2A8Z                    | 2                 | A                | A/157-146; A/168-179             | 12                         | 39,682          | L               |
|                | 2A9U                    | 2                 | A                | A/56-67; A/109-98                | 12                         | 56,564          | L               |
|                | 2C6F                    | 2                 | A                | A/107-121; A/185-171             | 15                         | 62,702          | L               |
|                | 2CBJ                    | 2                 | B                | B/522-540; B/573-555             | 19                         | 49,696          | L               |
|                | 2CFU                    | 2                 | A                | A/476-465; A/485-496             | 12                         | 45,010          | L               |
|                | 2CLY                    | 2                 | A,B              | A/127-138; B/30-41               | 12                         | 45,329          | L               |
|                | 2EWF                    | 2                 | A                | A/304-325; A/352-373             | 22                         | 58,903          | L               |
|                | 2GTQ                    | 2                 | A                | A/651-662; A/686-675             | 12                         | 39,691          | L               |

|                    |        |   |                  |                                    |    |         |   |
|--------------------|--------|---|------------------|------------------------------------|----|---------|---|
|                    | 2HLD   | 2 | P                | P/3-24; P/258-237                  | 22 | 68,929  | L |
| Isomerase          | 1A36   | 2 | A                | A/644-661; A/708-691               | 18 | 41,697  | L |
|                    | 1FP3   | 2 | A                | A/5-22; A/401-384                  | 18 | 61,905  | L |
|                    | 1IHG   | 2 | A                | A/334-323; A/343-354               | 12 | 33,955  | L |
|                    | 1IIP   | 2 | A,D <sup>4</sup> | A/239-286; D/286-239               | 48 | 129,500 | L |
|                    | 1N1B   | 2 | B                | B/93-82; B/274-285                 | 12 | 47,219  | L |
|                    | 1P5Q_0 | 2 | A,E              | A/422-404; E/404-422               | 19 | 60,940  | L |
|                    | 1P5Q_1 | 2 | A                | A/369-380; A/400-389               | 12 | 43,470  | L |
|                    | 1QZ2_0 | 2 | A,B              | A/404-422; B/422-404               | 19 | 64,245  | L |
|                    | 1QZ2_1 | 2 | B                | B/297-286; B/321-332               | 12 | 38,037  | L |
|                    | 1X94   | 2 | A,B              | A/21-10; B/10-21                   | 12 | 22,724  | L |
|                    | 1XRS   | 2 | A                | A/11-22; A/458-469                 | 12 | 38,772  | L |
|                    | 1YBZ   | 2 | A,B <sup>4</sup> | A/35-4; B/4-35                     | 32 | 76,697  | L |
|                    | 1ZVU   | 2 | A                | A/369-383; A/444-430               | 15 | 56,839  | L |
|                    | 2D8E   | 2 | A,B              | A/36-5; B/5-36                     | 32 | 80,750  | L |
|                    | 2FEL   | 2 | K                | K/124-138; K/186-172               | 15 | 39,342  | L |
|                    | 2NOV   | 2 | A                | A/361-379; A/453-435               | 19 | 76,391  | L |
| Structural         | 1DEB   | 2 | A,B              | A/6-41; B/6-41                     | 36 | 123,278 | L |
|                    | 1IO1   | 2 | A                | A/95-64; A/408-439                 | 32 | 76,870  | L |
|                    | 1LUJ   | 2 | A                | A/547-533; A/566-580               | 15 | 57,524  | L |
|                    | 1R0D   | 2 | G                | G/808-794; G/821-835               | 15 | 23,104  | L |
|                    | 1U89_0 | 2 | A                | A/767-784; A/873-856               | 18 | 49,947  | L |
|                    | 1U89_1 | 2 | A                | A/812-801; A/825-836               | 12 | 37,426  | L |
|                    | 1WU9   | 2 | A,B              | A/193-224; B/193-224               | 32 | 120,801 | L |
|                    | 1X8Y   | 2 | A,B              | A/316-380; B/316-380               | 65 | 190,837 | L |
|                    | 2D4Y_0 | 2 | A                | A/95-74; A/484-505                 | 22 | 88,777  | L |
|                    | 2D4Y_1 | 2 | A                | A/182-168; A/197-211               | 15 | 41,934  | L |
|                    | 2F6H   | 2 | X                | X/139-122; X/158-175               | 18 | 45,018  | L |
| Chaperone          | 1ELR   | 2 | A                | A/327-316; A/335-346               | 12 | 39,730  | L |
|                    | 1FXK_0 | 2 | A                | A/45-10; A/71-106                  | 36 | 111,794 | L |
|                    | 1FXK_1 | 2 | F                | F/45-7; F/94-132                   | 39 | 110,323 | L |
|                    | 1I6Z   | 2 | A                | A/145-166; A/207-186               | 22 | 55,594  | L |
|                    | 1ORJ   | 2 | A                | A/1037-1019; A/1103-1121           | 19 | 54,891  | L |
|                    | 1OX3   | 3 | A,B,C            | A/48-79; B/48-79; C/48-79          | 32 | 84,665  | L |
|                    | 1QVR   | 2 | A                | A/403-417; A/449-435               | 15 | 46,102  | L |
|                    | 1SG2   | 2 | C                | C/49-63; C/89-75                   | 15 | 42,754  | L |
|                    | 1XOU   | 2 | A,B              | A/156-184; B/6-34                  | 29 | 75,249  | L |
|                    | 1YT1   | 2 | B                | B/81-92; B/171-182                 | 12 | 31,684  | L |
|                    | 1ELR   | 2 | A                | A/327-316; A/335-346               | 12 | 39,730  | L |
| Electron transport | 1B71   | 2 | A                | A/84-98; A/142-128                 | 15 | 50,667  | L |
|                    | 1J30   | 2 | A                | A/82-96; A/140-126                 | 15 | 46,871  | L |
|                    | 1LM3   | 2 | D                | D/41-27; D/65-79                   | 15 | 28,734  | L |
| Endocytosis        | 1HVV   | 2 | B,D              | B/208-233; D/233-208               | 26 | 57,069  | L |
|                    | 1L4A   | 2 | B,C              | B/188-212; C/14-38                 | 25 | 64,306  | L |
|                    | 1URU   | 2 | A                | A/148-131; A/175-192               | 18 | 70,658  | L |
| Viral              | 1EBO_0 | 3 | A,B,C            | A/4-25; B/4-25; C/4-25             | 22 | 56,697  | L |
|                    | 1EBO_1 | 3 | A,B,C            | A/57-92; B/57-92; C/57-92          | 36 | 82,300  | L |
|                    | 1EIA   | 2 | A,B              | A/128-145; B/145-128               | 18 | 28,358  | L |
|                    | 1EZJ   | 4 | A,B,C,D          | A/53-92; B/53-92; C/53-92; D/53-92 | 40 | 57,996  | L |

|           |        |   |         |                                       |    |          |   |
|-----------|--------|---|---------|---------------------------------------|----|----------|---|
|           | 1G2C   | 3 | S,U,W   | S/164-192; U/164-192;<br>W/164-192    | 29 | 71,159   | L |
|           | 1G5G   | 3 | A,B,C   | A/172-218; B/172-218;<br>C/172-218    | 47 | 60,355   | L |
|           | 1HTM   | 3 | B,D,F   | B/41-95; D/41-95; F/41-95             | 55 | 87,560   | L |
|           | 1LJ2_0 | 2 | A,B     | A/213-230; B/213-230                  | 18 | 35,182   | L |
|           | 1LJ2_1 | 2 | A,B     | A/281-299; B/281-299                  | 19 | 52,173   | L |
|           | 1MG1   | 3 | A,B,C   | A/388-416; B/388-416;<br>C/388-416    | 29 | 72,337   | L |
|           | 1MOF   | 3 | A,B,C   | A/47-75; B/47-75; C/47-75             | 29 | 81,504   | L |
|           | 1NO4   | 2 | A,B     | A/36-71; B/36-71                      | 36 | 140,015  | L |
|           | 1SFK   | 2 | A,B     | A/94-77; B/77-94                      | 18 | 34,311   | L |
|           | 1SLQ   | 3 | D,E,F   | D/494-508; E/494-508;<br>F/494-508    | 15 | 31,307   | L |
|           | 1SVF   | 2 | A,E     | A/123-168; E/123-168                  | 46 | 130,686  | L |
|           | 1WYY   | 2 | A,C     | A/895-969; C/895-969                  | 75 | 187,408  | L |
|           | 1ZTM   | 3 | A,B,C   | A/183-211; B/183-211;<br>C/183-211    | 29 | 51,093   | L |
|           | 1ZVB   | 3 | A,B,C   | A/9-30; B/9-30; C/9-30                | 22 | 51,350   | L |
|           | 2BEQ   | 3 | A,B,C   | A/923-948; B/923-948;<br>C/923-948    | 26 | 61,930   | L |
|           | 2C9L   | 2 | Y,Z     | Y/193-221; Z/193-221                  | 29 | 100,017  | L |
|           | 2FXP   | 3 | A,B,C   | A/20-47; B/20-47; C/20-47             | 28 | 76,456   | L |
|           | 2GUM   | 3 | A,B,C   | A/528-542; B/528-542;<br>C/528-542    | 15 | 40,127   | L |
| Synthetic | 1RH4   | 4 | A,B,C,D | A/10-32; B/10-32; C/10-32;<br>D/10-32 | 23 | 2,359    | L |
| Collagen  | 1BKV   | 3 | A,B,C   | A/2-30; B/32-60; C/62-90              | 29 | -398,815 | D |
|           | 1CAG   | 3 | A,B,C   | A/1-29; B/32-60; C/61-89              | 29 | -446,710 | D |
|           | 1CGD   | 3 | A,B,C   | A/1-30; B/31-60; C/61-90              | 30 | -471,045 | D |
|           | 1NAY   | 3 | A,B,C   | A/106-126; B/207-227;<br>C/306-326    | 21 | -287,968 | D |
|           | 2DRT   | 3 | A,B,C   | A/2-28; B/2-28; C/2-28                | 27 | -419,433 | D |
|           | 2DRX   | 3 | A,B,C   | A/2-28; B/2-28; C/2-28                | 27 | -402,738 | D |
|           | 3WN8   | 3 | A,B,C   | A/1-23; B/1-23; C/1-23                | 23 | -328,969 | D |
|           | 4AXY   | 3 | A,B,C   | A/1-18; B/1-18; C/1-18                | 18 | -218,711 | D |
|           | 4Z1R   | 3 | A,B,C   | A/1-24; B/33-56; C/63-86              | 24 | -353,039 | D |
|           | 6HG7   | 3 | A,B,C   | A/1-36; B/1-36; C/1-36                | 36 | -487,006 | D |
|           | 6W46   | 3 | A,B,C   | A/1-30; B/1-30; C/1-30                | 30 | -451,952 | D |
|           | 6W47   | 3 | A,B,C   | A/2-26; B/2-26; C/2-26                | 25 | -342,840 | D |

<sup>1</sup> The PDB ID of the protein from which the superhelix was taken is indicated as the name of the superhelix. In cases where several superhelices from the same file were considered, they were assigned additional numeric indexes indicated after the underscore.

<sup>2</sup> Amino acid residues are indicated in the following format: chain\_1/first\_residue\_1-last\_residue\_1; chain\_2/first\_residue\_2-last\_residue\_2...

<sup>3</sup> Helix lengths are designated in amino acid residues.

<sup>4</sup> These chains are recorded in PDB files in a structure marked as BIOMOLECULE 2.
